# Supplementary material for: Paper-based pump-free magnetophoresis
Source: Royal Society of Chemistry journal article supplement (doi:10.1039/d0ay01523g), 2020-01-01
Supplement: d0ay01523g1.pdf [file d0ay01523g1.pdf]

## Supplemental Material – “Paper-Based Pump-Free Magnetophoresis”

Zachary D. Call<sup>1</sup>, Cody S. Carrell<sup>1</sup>, Ilhoon Jang<sup>1,2</sup>,

Brian J. Geiss<sup>4,5</sup>, David S. Dandy<sup>3,4</sup>, Charles S. Henry<sup>1,4\*</sup>

<sup>1</sup>Department of Chemistry, Colorado State University, Fort Collins, CO 80523,  
USA

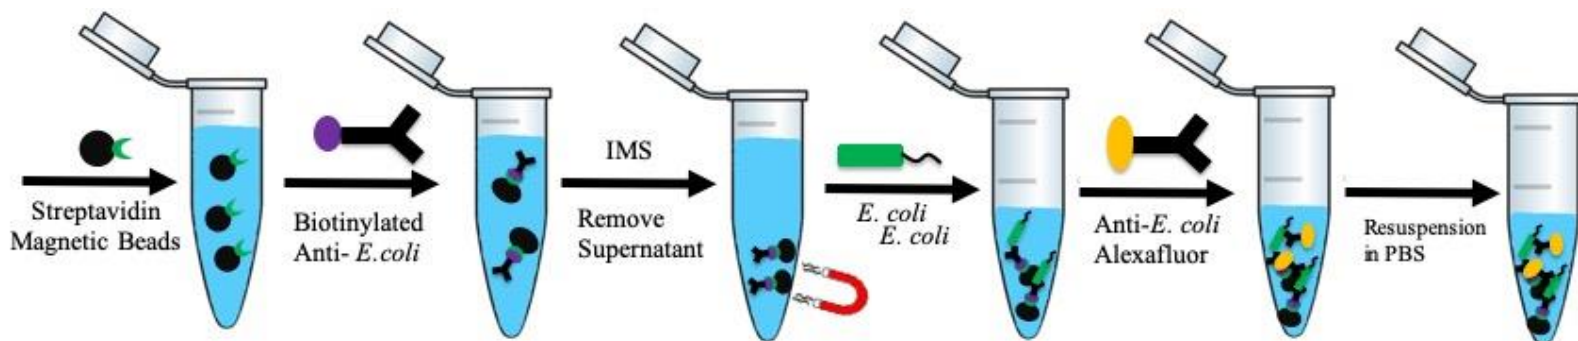

Figure 1: Immunomagnetic separation schematic

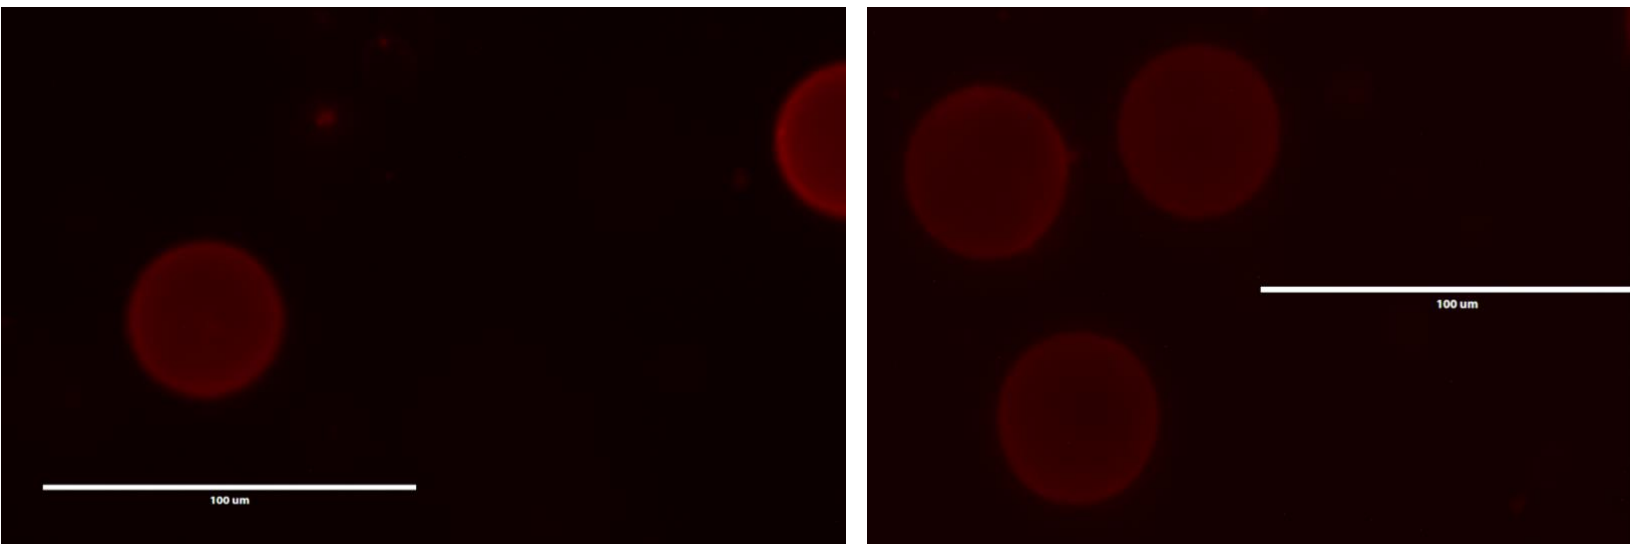

Figure 2: Fluorescent microscope images of two separate trials of the blank control. Beads were incubated with every step of previous schematic except *E. coli*.

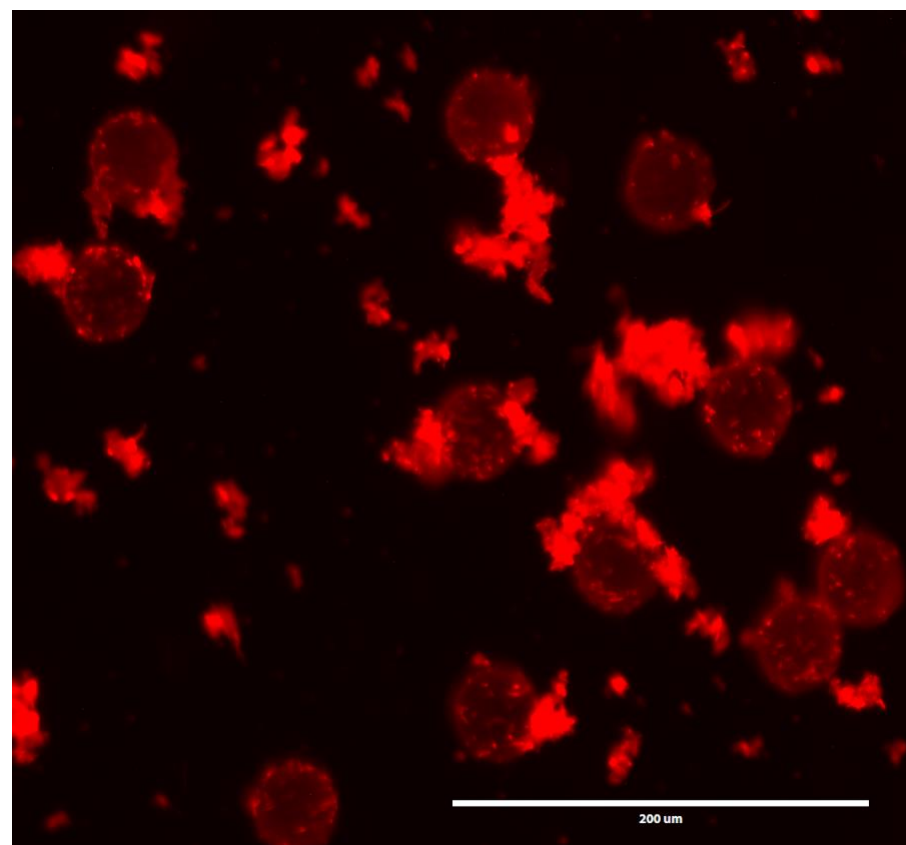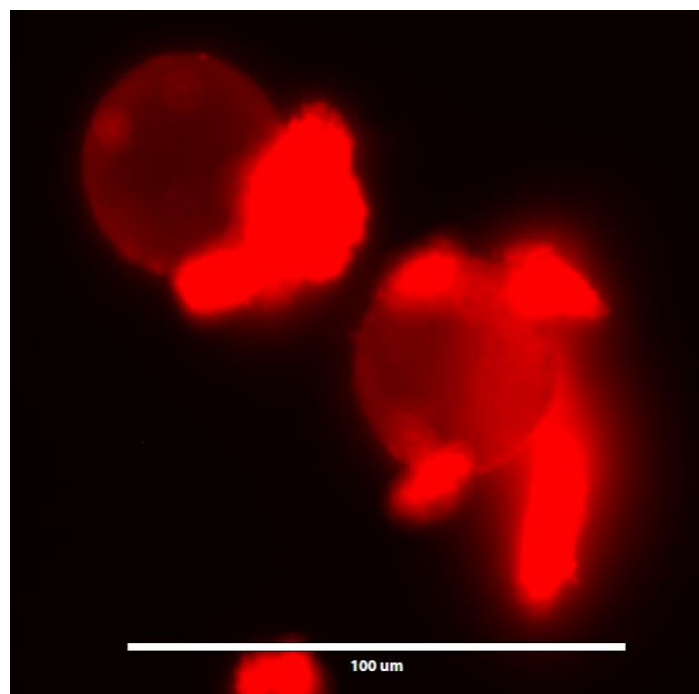

*Figure 3: Fluorescent microscope images of E. coli bound to magnetic bead with a fluorescent tag.*
